# Supplementary material
Source: publisher figshare collection journal article supplement (https://acs.figshare.com/ndownloader/files/4076809)
Supplement: Supplementary file 1 [file 4076809]

## SUPPORTING INFORMATION

### Appendix A: Scaled particle theory for ethyl acetate (1) - ethanol (2) – salt (3) system

The theory illustrates the principle of extractive distillation to separate an azeotrope using salt as third component. The system under consideration consists of the following two solvents combined with salt, [1] Ethyl acetate, [2] Ethanol. The subscripts 1, 2, 3 & 4 are used to represent ethyl acetate, ethanol, cation of the salt and anion of the salt respectively.

**For 1:1 electrolyte,**

**Expression for  $k_\gamma$ :-**

$$\sum \rho_i = \rho_1 + \rho_2 + \rho_3 + \rho_4 \quad (\text{A.1})$$

Neglecting  $\rho_1$ , we get the following equation,

$$\sum \rho_i = \rho_2 + \rho_3 + \rho_4 \quad (\text{A.2})$$
$$\rho_2 = \frac{Nd_2}{M_2} \left( 1 - \frac{c\phi}{1000} \right)$$

$$\rho_3 = \rho_4 = \frac{Nc}{1000}$$

Where,  $M_2$  represents molecular weight of ethanol = 46.07 g/mol,  $d_2$  represents density at 25°C = 785.22 kg.m<sup>-3</sup>,  $\phi^0$  represents apparent molal volume of salt at infinite dilution at 25 °C

$$\ln \sum \rho_i = \ln \frac{Nd_2}{M_2} \left[ 1 - \frac{c\phi}{1000} + \frac{2cM_2}{1000d_2} \right] \quad (\text{A.3})$$

$$\frac{1}{2.3} \ln \sum \rho_i = \frac{1}{2.3} \ln \frac{Nd_2}{M_2} \left[ 1 - \frac{c\phi}{1000} + \frac{2cM_2}{1000d_2} \right]$$

$$k_\gamma = \left[ \frac{d}{dc} \log \sum \rho_i \right]_{c \rightarrow 0} = \frac{2M_2}{2300d_2} - \frac{\phi}{2300} \quad (\text{A.4})$$

After substitution of values, we get,

$$k_\gamma = 0.0510 - 4.34 \times 10^{-4} \phi \quad (\text{A.5})$$

**Expression for  $k_\beta$ :-**

$$\frac{\bar{g}_1^s}{2.3kT} = \frac{-32\pi Nc}{9000(2.3T)} \left[ \frac{\varepsilon_{13}\sigma_{13}^3}{k} + \frac{\varepsilon_{14}\sigma_{14}^3}{k} \right] - \frac{4\pi Nd_2}{3(2.3T)M_2} \left[ 1 - \frac{c\phi}{1000} \right] \left[ \frac{8\varepsilon_{12}\sigma_{12}^3}{3k} + \frac{\mu_2^2\alpha_1}{k\sigma_{12}^3} \right] \quad (A.6)$$

Considering the first derivative of the above equation with respect to ‘C’ and by further simplification we arrive at,

$$k_\beta = \frac{d}{dc} \left[ \frac{\bar{g}_1^s}{2.3kT} \right]_{c \rightarrow 0} = -9.8095 \times 10^{18} \left[ \frac{\varepsilon_{13}\sigma_{13}^3}{k} + \frac{\varepsilon_{14}\sigma_{14}^3}{k} \right] + 1.6719 \times 10^{17} \phi \left[ \frac{\varepsilon_{12}\sigma_{12}^3}{k} \right] + \frac{4\pi Nd_2\mu_2^2}{3000(2.3T)M_2\sigma_{12}^3} \quad (A.7)$$

Taking  $\mu_2 = 1.69 \text{E-}18 \text{ cm}$ ;  $T = 298 \text{K}$ ,

The mixture parameters must be related to those parameters of the pure species. Hence we use a rule which is known as the “mixing rule”, by which,

$$\varepsilon_{ij} = (\varepsilon_i \varepsilon_j)^{\frac{1}{2}}; \sigma_{ij} = \frac{\sigma_i + \sigma_j}{2}$$

And thereby assign a numerical value for  $k_\beta$ . The numerical value for the energy parameter

$$\frac{\varepsilon_1}{k} = 450.$$

Also the values of  $\varepsilon/k$  for the cation and anion of the salt can be obtained by using Mavroyannis-Stephen equation, given as,

$$\frac{\varepsilon_j}{k} = 2.28 \times 10^{-8} \frac{\alpha_j^{\frac{3}{2}} z_j^{\frac{1}{2}}}{\sigma_j^6}$$

$$\begin{aligned}
k_\beta = & -1.85 \times 10^{14} \left( \frac{\varepsilon_1}{k} \right)^{\frac{1}{2}} \left[ \alpha_3^{\frac{3}{4}} z_3^{\frac{1}{4}} \left( \frac{\sigma_1 + \sigma_3}{\sigma_3} \right)^3 + \alpha_4^{\frac{3}{4}} z_4^{\frac{1}{4}} \left( \frac{\sigma_1 + \sigma_4}{\sigma_4} \right)^3 \right] \\
& + 4.43 \times 10^{17} \phi \left( \frac{\varepsilon_1}{k} \right)^{\frac{1}{2}} (\sigma_1 + \sigma_2)^3 + 1.03 \times 10^{-2} \frac{\phi \alpha_1}{(\sigma_1 + \sigma_2)^3}
\end{aligned} \tag{A.8}$$

### Expression for $k_\alpha$ :-

The expression for free energy of cavity formation according to Scaled Particle Theory is as follows,

$$\frac{\bar{g}_1^h}{2.3kT} = -\log(1 - \tau_3) + A \tag{A.9}$$

$$\begin{aligned}
A = & \frac{3\tau_2\sigma_1}{2.3(1-\tau_3)} \left[ 1 + \frac{\tau_1\sigma_1}{\tau_2} + \frac{3\tau_2\sigma_1}{2(1-\tau_3)} \right] \\
\tau_n = & \frac{\pi}{6} \sum_1^n \rho_j \sigma_j^n
\end{aligned} \tag{A.10}$$

$$\tau_1 = \frac{\pi}{6} \frac{Nd_2\sigma_2}{M_2} + c \left[ \frac{\pi}{6} \frac{N}{1000} (\sigma_3 + \sigma_4) - \frac{\pi}{6} \frac{Nd_2\sigma_2}{M_2} \frac{\phi}{1000} \right]$$

On substitution of values namely,

$$\begin{aligned}
\tau_1 = & 2.33 \times 10^{14} + c \left[ 3.15 \times 10^{20} (\sigma_3 + \sigma_4) - 2.33 \times 10^{11} \phi \right] \\
\tau_2 = & 1.012 \times 10^7 + c \left[ 3.15 \times 10^{20} (\sigma_3^2 + \sigma_4^2) - 1.012 \times 10^4 \phi \right] \\
\tau_3 = & 0.439 + c \left[ 3.15 \times 10^{20} (\sigma_3^3 + \sigma_4^3) - 4.393 \times 10^{-4} \phi \right] \\
\ln \tau_1 - \ln \tau_2 = & \ln(2.33 \times 10^{14} - 1.012 \times 10^7) + 1351931.33 (\sigma_3 + \sigma_4) c - 3.113 \times 10^{13} (\sigma_3^2 + \sigma_4^2) c \\
\frac{\tau_1}{\tau_2} = & 2.30 \times 10^7 + c \left[ 3.113 \times 10^{13} (\sigma_3 + \sigma_4) - 7.16 \times 10^{20} (\sigma_3^2 + \sigma_4^2) \right] \\
\frac{\tau_2}{1 - \tau_3} = & 1.80 \times 10^7 + c \left[ 5.59 \times 10^{20} (\sigma_3^2 + \sigma_4^2) + 1.01 \times 10^{28} (\sigma_3^3 + \sigma_4^3) - 3.21 \times 10^4 \phi \right] \\
A = & \frac{3\tau_2\sigma_1}{2.3(1-\tau_3)} \left[ 1 + \frac{\tau_1\sigma_1}{\tau_2} + \frac{3\tau_2\sigma_1}{2(1-\tau_3)} \right]
\end{aligned} \tag{A.11}$$

$$\begin{aligned}
&= 2.35 \times 10^7 \sigma_1 + c \sigma_1 \left[ 7.29 \times 10^{20} (\sigma_3^2 + \sigma_4^2) + 1.32 \times 10^{28} (\sigma_3^3 + \sigma_4^3) - 4.19 \times 10^4 \phi \right] \\
&+ c \sigma_1^2 \left[ 7.31 \times 10^{20} (\sigma_3 + \sigma_4) + 3.94 \times 10^{28} (\sigma_3^2 + \sigma_4^2) + 1.02 \times 10^{36} (\sigma_3^3 + \sigma_4^3) - 3.23 \times 10^{12} \phi \right] \\
k_\alpha &= \left[ \frac{d \left[ \log(1 - \tau_3) \right]}{dc} + \frac{dA}{dc} \right]_{c \rightarrow 0} \\
k_\alpha &= 2.44 \times 10^{20} (\sigma_3^3 + \sigma_4^3) - 3.40 \times 10^{-4} \phi + \sigma_1 \left[ 7.29 \times 10^{20} (\sigma_3^2 + \sigma_4^2) + 1.32 \times 10^{28} (\sigma_3^3 + \sigma_4^3) - 4.19 \times 10^4 \phi \right] \\
&+ \sigma_1^2 \left[ 7.31 \times 10^{20} (\sigma_3 + \sigma_4) + 3.94 \times 10^{28} (\sigma_3^2 + \sigma_4^2) + 1.02 \times 10^{36} (\sigma_3^3 + \sigma_4^3) - 3.23 \times 10^{12} \phi \right]
\end{aligned} \tag{A.12}$$

**For 1:2 electrolyte,**

The following derivation is done on the same basis as that of the system containing a 1:1 electrolyte and the corresponding expressions for  $k_\alpha, k_\beta, k_\gamma$  are obtained. The only difference is that the system considered here, is composed of two moles of anion and one mole of cation thereby leading to a change in density of a solution.

**Expression for  $k_\gamma$ :-**

$$\begin{aligned}
\rho_2 &= \frac{Nd_2}{M_2} \left( 1 - \frac{c\phi}{1000} \right), \quad \rho_3 = \frac{Nc}{1000}, \\
\rho_4 &= \frac{2Nc}{1000} \\
k_\gamma &= \frac{3M_2}{2300d_2} - \frac{\phi}{2300}
\end{aligned} \tag{A.13}$$

**Expression for  $k_\beta$ :-**

$$\begin{aligned}
k_\beta &= 1.8515 \times 10^{14} \left( \frac{\varepsilon_1}{k} \right)^{\frac{1}{2}} \left[ \alpha_3^{\frac{3}{4}} z_3^{\frac{1}{4}} \frac{(\sigma_1 + \sigma_3)^3}{\sigma_3^3} + \alpha_4^{\frac{3}{4}} z_4^{\frac{1}{4}} \frac{(\sigma_1 + \sigma_4)^3}{\sigma_4^3} \right] \\
&+ 4.433 \times 10^{17} \phi \left( \frac{\varepsilon_1}{k} \right)^{\frac{1}{2}} (\sigma_1 + \sigma_2)^3 + 1.038 \times 10^{-2} \frac{\phi \alpha_1}{(\sigma_1 + \sigma_2)^3}
\end{aligned} \tag{A.14}$$

**Expression for  $k_\alpha$ :-**

$$\begin{aligned}
k_\alpha &= 7.32 \times 10^{20} (\sigma_3^3 + \sigma_4^3) - 3.40 \times 10^{-4} \phi + \sigma_1 \left[ 2.19 \times 10^{21} (\sigma_3^2 + \sigma_4^2) + 3.96 \times 10^{28} (\sigma_3^3 + \sigma_4^3) - 4.19 \times 10^4 \phi \right] \\
&+ \sigma_1^2 \left[ 2.19 \times 10^{21} (\sigma_3 + \sigma_4) + 1.18 \times 10^{29} (\sigma_3^2 + \sigma_4^2) + 3.05 \times 10^{36} (\sigma_3^3 + \sigma_4^3) - 3.23 \times 10^{12} \phi \right]
\end{aligned} \tag{A.15}$$

## **NOMENCLATURE**

|                               |                                                             |
|-------------------------------|-------------------------------------------------------------|
| $c$                           | Concentration of salt, mol/l                                |
| $k_s$                         | Salting coefficient                                         |
| $k_\alpha, k_\beta, k_\gamma$ | Contributions to salting coefficient                        |
| $M$                           | Molecular weight (g/mol)                                    |
| $N$                           | Avogadro number                                             |
| $S$                           | Solubility of non-electrolyte in salt solution              |
| $S_o$                         | Solubility of non-electrolyte in pure water                 |
| $T$                           | Temperature, °C                                             |
| $x'_i$                        | Salt free mole fraction of component i in liquid            |
| $y_i$                         | mole fraction of component i in Vapor                       |
| $z$                           | Salt mole fraction                                          |
| $\gamma_i$                    | activity coefficient of component i in liquid               |
| $\alpha_1$                    | Polarizability of non-electrolyte                           |
| $\rho_i$                      | Density of the components (g/cc)                            |
| $\sigma$                      | molecule size or ion diameter (°A)                          |
| $\phi^\circ$                  | apparent molal volume of salt at infinite dilution (cc/mol) |
| $\varepsilon/k$               | interaction energy parameter (K)                            |
